# Supplementary material for: Information gain modulates brain activity evoked by reading
Source: PubMed Central journal article supplement (PMC7203262; doi:10.1038/s41598-020-63828-5), 2020-05-06
Supplement: 41598_2020_63828_MOESM1_ESM.pdf [file 41598_2020_63828_MOESM1_ESM.pdf]

1 **Supplementary Information for**  
2 **Information gain modulates brain activity evoked by reading**

3 **Lauri Kangassalo, Michiel Spapé, Niklas Ravaja, and Tuukka Ruotsalo**

4 **The correspondence should be addressed to Tuukka Ruotsalo: [tuukka.ruotsalo@helsinki.fi](mailto:tuukka.ruotsalo@helsinki.fi)**

5 **This PDF file includes:**

- 6 Supplementary text
- 7 Figs. S1 to S2
- 8 Tables S1 to S3
- 9 Caption for Movie S1
- 10 References for SI reference citations

11 **Other supplementary materials for this manuscript include the following:**

- 12 Movie S1

## 13 Supporting Information Text

### 14 Information gain

15 **Model.** The information gain ( $IG$ ) of a word is defined as the change in Shannon entropy over documents  $H(D)$  when new  
16 evidence  $w$  is observed. Given that entropy is a measure of uncertainty, information gain is the decrease in uncertainty  
17 concerning documents upon observing evidence. Formally, information gain is defined as  $IG(D|w) = H(D) - H(D|w)$ . To  
18 compute these entropies, we need to define a prior probability distribution for the documents  $P(d)$ , and a generative probability  
19 for a document given a word  $P(d|w)$ .

20  $P(d)$  is the probability of a document being drawn from the document pool without any observed words.  $P(d)$  could be  
21 used to introduce a priori information about the documents, such as document length, popularity, or newness. However, we are  
22 particularly interested in how much information gain is achieved when perceiving a word  $w$ , independent of any artificially  
23 introduced prior information. Thus, we define each document to be equally likely to be drawn from the document pool, formally  
24  $P(d) = \frac{1}{|D|}$ .

The generative probability of a document given a word,  $P(d|w)$ , is defined using a derivative of a generative likelihood  
model (1). First, we assign a probability  $P(w|M_d)$  for a word  $w$  given a document model  $M_d$  for a document  $d$ . The document  
model is a bag-of-words representation of a document, in which the order of the words is disregarded, and only the frequency of  
each word is preserved. The probability of a word occurring generated by a document can be estimated as:

$$P(w|M_d) = \frac{f_{w,d}}{f_d},$$

such that

$$\sum_{w \in M_d} P(w|M_d) = 1,$$

25 where  $f_{w,d}$  stands for word frequency for word  $w$  in document  $d$  and  $f_d$  is the total amount of words in  $d$ .

26 Next, since we are interested in the distribution of documents given a word, we calculate  $P(d|w)$ . By utilizing Bayes' rule  
27 this becomes:

$$P(d|w) \propto P(w|d)P(d),$$

28 where  $P(d)$  can be ignored, since it is the same for all  $d$ . Since we defined that the documents have an uniform prior probability,  
29 the equation can be simplified further:

$$P(d|w) \propto P(w|d)$$

30 Due to this,  $P(w|d)$  can be used to compute the probability of a word "generating" a document.

We are now ready to compute the a priori entropy over documents  $H(D)$  and the entropy over documents when observing a  
word  $H(D|w)$ . By using the definition of entropy and conditional entropy, we get

$$H(D) = - \sum_{d \in D} P(d) \log_2 P(d)$$

and

$$H(D|w) = - \sum_{d \in D} P(d|w) \log_2 P(d|w)$$

Since  $P(d)$  is uniform,  $H(D)$  will yield the maximum entropy for the given set of documents, formally  $H(D) = \log_2(|D|)$ . From  
here it follows that we now have a model for computing the information gain of a word  $w$  given a collection of documents  $D$ :

$$\begin{aligned} IG(D|w) &= H(D) - H(D|w) \\ &= \log_2(|D|) + \sum_{d \in D} P(d|w) \log_2 P(d|w) \end{aligned}$$

31 To understand how the measure of information gain works, let us view how the generative distribution of documents changes  
when conditioned on different words. Consider a collection of 50 Wikipedia articles  $D'$ . A language model is generated for each  
of these documents as specified above, and the generative probabilities  $P(d|w)$  are computed for all  $d \in D'$  given the words *the*,  
*small*, and *cat*. These words are examples of low, medium, and high information gain words, respectively. Figure S1 displays  
the probability distributions of  $P(D'|w)$  for each of the aforementioned words, alongside with the conditional entropy of each  
distribution  $H(D'|w)$ . We see that  $H(D'|w)$  is highest for the word *the*, which is due to the fact that the frequency of *the*  
is roughly the same in all of the documents. This implies that *the* is not very good at discriminating documents from each  
other. On the other hand, the word *cat* occurs only in one document in our limited collection. This makes the entropy of the  
document distribution fall to zero, because there is no uncertainty about a document given the word; we are certain that the  
document is the one in which *cat* occurs. In a larger collection of documents, say, one consisting millions of documents, it

would be very unlikely for a word to occur in only one document. Lastly, the word *small* falls between the words *the* and *cat* in terms of entropy. It occurs in some documents but not all, and thus is somewhat descriptive in terms of documents. To study the information gains of these three words, we simply subtract the conditional entropy from the a priori entropy, which for our collection is  $H(D') = \log_2 50 = 3.91$ :

$$\begin{aligned} IG(D'|the) &= 3.91 - 3.71 = 0.20 \\ IG(D'|small) &= 3.91 - 1.53 = 2.38 \\ IG(D'|cat) &= 3.91 - 0.0 = 3.91 \end{aligned}$$

We see that the highest information gain of these three words is achieved with the word *cat*, with the word *the* having the least information gain, and *small* falling between these two. To conclude, words that occur only in select few documents with varying frequencies will tend to have a higher information gain than those words that occur in great many documents with approximately equal frequency. Thus, information gain is an estimate of the information gained on a topic upon observing a particular word.

**Computation of information gain.** In the present study, information gain of each word was computed from the English Wikipedia using the aforementioned model. Document models of all of Wikipedia's articles were generated. Prior to constructing these models punctuation marks were removed from the text and the words were stemmed using the Porter stemming algorithm (2). The Porter stemmer removes the suffixes of words, attempting to map words with similar meanings to one word. For example, the following words:

`connect, connected, connecting, connection, connections`

all map to the stem `connect` and words

`cat, cats`

both map to the stem `cat`.

A word likelihood model was constructed using the aforementioned models. Using these models, information gain was computed for each of the stemmed words. Words with information gain in the 75th percentile were labelled as high information gain words (label 1), and words with information gain less than the 75th percentile low information gain words (label 0). These labels were employed for data visualisation and classifier training, but not for significance testing, for which continuous values of information gain were used. A histogram of the occurrences of information gain of words can be seen in Figure 1 (left).

## Technical details of experimental procedure and data analysis

**Apparatus and stimuli.** Words were presented with an 18-point Lucida Console black typeface at the centre of the 19" LCD screen. They were shown against a silver (RGB 82%, 82%, 82%) background in the middle of a 300 x 100 pixel pattern mask. The mask was a black rectangle with a grid-like pattern, with an opening to show the word. This was used to control the degree to which word length affected light reaching the eyes (i.e. To make sure longer words were not tantamount to more black pixels on the screen). Sentence separators were word-like character repetitions consisting of 4 to 9 numbers (3333333) or other non-alphabetic characters (&&&&&&), which were designed to mimic the same early visual activity as words without evoking psycholinguistic processing.

The screen was positioned approximately 60 cm from the participants and was running at a resolution of 1680 x 1050 and a refresh rate of 60 Hz. Stimulus presentation, timing, and EEG synchronization were controlled using E-Prime 2 Professional 2.0.10.353 on a PC running Windows XP SP3. EEG was recorded from 32 Ag/AgCl electrodes, positioned on standardised (using EasyCap elastic caps, EasyCap GmbH, Herrsching, Germany), equidistant electrode sites of the 10 - 20 system via a QuickAmp (BrainProducts GmbH, Gilching, Germany) amplifier running at 2000 Hz. Additionally, the electro-oculogram for vertical eye movements (and eye blinks) and horizontal eye movements was recorded using bipolar electrodes positioned respectively 2 cm superior/inferior to the right pupil and 1 cm lateral to the outer canthi of both eyes.

**Formal definitions of the Linear Mixed Models.** The significance of the findings was tested with Likelihood Ratio Tests (LRTs) between an alternative hypothesis model and a null hypothesis model. The initial models were designed according to the "keep it maximal" -principle (3). Due to convergence failures, however, we dropped the random effects explaining the least variance and refit the models until convergence was achieved, as suggested in (3, 4).

Formally, the initial models were specified as follows. Alternative hypothesis model:

$$Y_{pi} = (\beta_1 + P_{1p})G_i + (\beta_2 + P_{2p})L_i + (\beta_3 + P_{3p})F_i + (\beta_4 + P_{4p})C_i + \beta_5 Z_{pi} + P_{0i} + I_i + \beta_0 + e_{pi}.$$

Null hypothesis model:

$$Y_{pi} = P_{1p}G_i + (\beta_2 + P_{2p})L_i + (\beta_3 + P_{3p})F_i + (\beta_4 + P_{4p})C_i + \beta_5 Z_{pi} + P_{0i} + I_i + \beta_0 + e_{pi}.$$

Fixed effects in the models were information gain ( $G_i$ ), word length ( $L_i$ ), word log-frequency in the whole corpus ( $F_i$ ), word class (content/functional word) ( $C_i$ ), and document interest preference ( $Z_i$ ), for word  $i$ . Their corresponding slopes were  $\beta_1$ ,

$\beta_2, \beta_3, \beta_4$ , and  $\beta_5$ , respectively. The random intercepts were the participant ( $P_{0p} \sim N(0, \tau_0^2)$  for participant  $p$ ), and the item (word) ( $I_i \sim N(0, \gamma^2)$ ). Additionally, the model had a random by-participant slope for the effects of information gain, word length, word log-frequency, and word class ( $P_{1p} \sim N(0, \tau_1^2), P_{2p} \sim N(0, \tau_2^2), P_{3p} \sim N(0, \tau_3^2)$ , and  $P_{4p} \sim N(0, \tau_4^2)$ , respectively).  $\beta_0$  is the overall intercept and  $e_{pi} \sim N(0, \sigma^2)$  represents the general error term. The null model was the same as the alternative hypothesis model, except that the fixed effect of information gain was omitted.

After dropping the effects explaining the least variance to achieve convergence, the alternative hypothesis model was formulated as:

$$Y_{pi} = \beta_1 G_i + \beta_2 L_i + \beta_3 F_i + \beta_4 C_i + \beta_5 Z_{pi} + P_{0i} + I_i + \beta_0 + e_{pi}.$$

The null model was constructed by removing the fixed effect of information gain, as above. This formulation was used to compute the results displayed in Table 1.

Since LMMs without a random slope structure may have an increased Type 1 error rate (3), we wanted to ensure that we achieved similar results from the full (non-converging) and reduced (converging) models. Thus, we compared their performance as seen in Table S1. The table displays the Akaike’s Information Criterion (AIC), which measures the tradeoff between the goodness-of-fit and model simplicity (5). AIC depends on the component tested and is sometimes lower (better) on the full model and sometimes on the reduced model. Thus, we find that the evidence is not fully conclusive as to which model (full or reduced) provides a better fit for the data. Furthermore, the table displays the  $\chi^2$  values of LRT tests between alternate (effect of information gain included) and null (effect of information gain omitted) hypothesis models. The  $\chi^2$  values are mostly similar, with the exception of the P300 component, which has a much lower  $\chi^2$  value in the reduced model. We can conclude that the results do not change substantially due to the use of a model without random slopes.

| Component |          | Full   | Reduced |
|-----------|----------|--------|---------|
| EPS       | AIC      | 155017 | 155023  |
|           | $\chi^2$ | 5.29   | 5.98    |
| P200      | AIC      | 151894 | 151889  |
|           | $\chi^2$ | 4.39   | 4.68    |
| P300      | AIC      | 159092 | 159111  |
|           | $\chi^2$ | 7.63   | 2.72    |
| N400      | AIC      | 160943 | 160980  |
|           | $\chi^2$ | 7.37   | 7.73    |
| P600      | AIC      | 160170 | 160159  |
|           | $\chi^2$ | 3.43   | 3.46    |

**Table S1. Akaike’s information Criterion and  $\chi^2$ s of null vs. alternative model for the full model (no convergence) and reduced model (convergence). The  $\chi^2$  values in the right column match with the results reported in Table 1.**

## Information gain prediction

**Classifier details and feature engineering.** Since we wanted the classifier to utilize both the spatial attributes (channels) as well as the temporal attributes (time w.r.t. stimulus onset) of the data, all channels and sufficient temporal resolution was used to determine classifier features. The tensor  $X^{m \times c \times t}$  represents the preprocessed EEG recording for each participant, with  $m$  cleaned epochs,  $c$  channels and  $t$  time points. To reduce the dimensionality of the data, the time points were divided to  $t' = 8$  equidistant windows between 0ms and 1000ms, and the average voltage of each of these windows was computed, resulting in a  $X^{m \times c \times t'}$  tensor. This led to time windows spanning 80ms. Furthermore, the channels and time windows were concatenated together, resulting in a  $X^{m \times c \cdot t'}$  spatio-temporal feature matrix. Essentially, the classifier was trained with all of the available data, and the feature engineering decisions were not informed by the statistical significance performed on the ERPs. This feature engineering procedure follows standards for single-trial ERP classification (6). Since the data is of a relatively high dimensionality ( $32 \cdot 8 = 256$ ) compared to the number of data points (approximately 1400 per training set), LDA with shrinkage was employed. The tuning parameter for shrinkage was chosen with the Ledoit-Wolf -lemma (7).

To be able to evaluate the classifiers, the epochs of each participant were split to eight blocks  $B = \{b_0, \dots, b_7\}$  coinciding with the eight reading tasks in the EEG measurement experiment. Consequently, each block consisted of the epochs for two documents. A classifier was trained for each block  $b_i$  so that each of these classifiers used seven of the other available blocks as a training set  $X_{\{B \setminus b_i\}}^{(m-m_i) \times c \cdot t'}$ , and were evaluated on the test set  $X_{b_i}^{m_i \times c \cdot t'}$ .

The classifiers were trained with the information gain labels (low/high). The split at the 75th percentile resulted in imbalanced classes; however, LDA has been shown to be robust against class imbalances (8, 9).

**Classifier performance evaluation.** The performance of the classifier was measured with the Area under the ROC curve (AUC). This measure was chosen because AUC combines the true positive and false positive rate, and thus gives sufficient performance estimates when the classes are imbalanced. In the case of imbalanced classes, the classifier will tend to predict the dominant class (in this case the high IG class), which causes a standard accuracy measure to give overconfident estimates of performance.

The classifier performance was evaluated with permutation tests. The classifier was trained with permuted class labels to reveal if the classifier had learnt any real class structure in the data. With a sufficiently high number of permutations this

115 produces permutation-based p-values (10). The null hypothesis is that the class labels and brain activity are independent of  
116 each other. A small p-value indicates that the classifier is able to find some meaningful structure of the brain activity that  
117 correlates with the class labels (high/low information gain). We ran  $k = 1000$  permutations for each subject, so  $k$  classifiers  
118 with randomly permuted labels were trained for each subject, and their AUCs were compared to the AUC of the actual classifier  
119 to produce the p-values. To obtain the AUCs for each subject, we calculated the mean of the AUCs of the per-block classifiers.

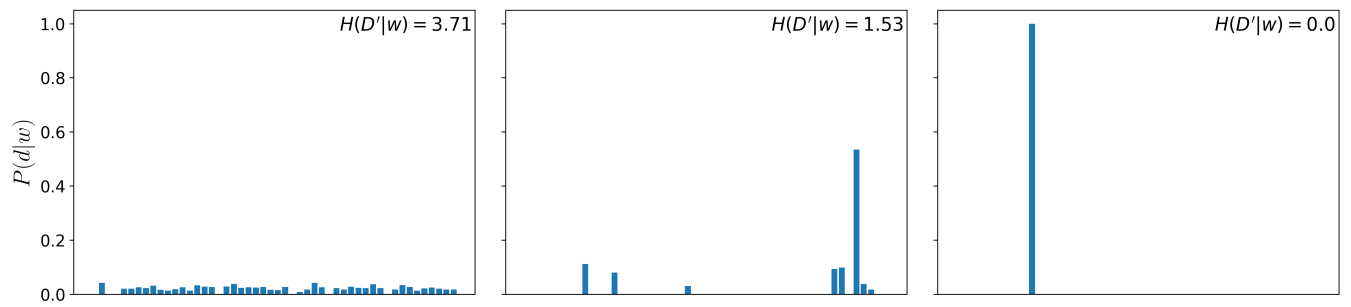

**Fig. S1.** Probability distributions over 50 randomly chosen Wikipedia documents for the words 'the', 'small' and 'cat'. Conditional entropies ( $H(D'|w)$ ) of the distributions are shown in the upper right corner of each plot.

**Table S2. EEG preprocessing details.**

| Subject | Threshold ( $\mu V$ ) | Trials recorded | Trials dropped | Channels dropped          |
|---------|-----------------------|-----------------|----------------|---------------------------|
| S01     | 57,42                 | 1 941           | 388            | None                      |
| S02     | 33,88                 | 1 961           | 392            | Fp1, Fp2, TP9, TP10, FT10 |
| S03     | 65,54                 | 1 936           | 387            | Fp1, Fp2                  |
| S04     | 30,64                 | 1 986           | 397            | Fp1, Fp2, P7              |
| S05     | 31,19                 | 1 959           | 391            | Fp1, Fp2, F7, TP9, TP10   |
| S06     | 51,04                 | 1 960           | 392            | Fp1, Fp2, O2              |
| S07     | 27,98                 | 1 869           | 373            | TP10                      |
| S08     | 62,90                 | 1 958           | 391            | Fp1, Fp2, TP9             |
| S09     | 47,25                 | 1 818           | 363            | None                      |
| S10     | 28,69                 | 2 026           | 405            | Fp1, Fp2, O2              |
| S11     | 57,04                 | 1 939           | 387            | None                      |
| S12     | 40,61                 | 1 944           | 388            | Fp1, Fp2, F7, TP9         |
| S13     | 35,28                 | 1 869           | 379            | Fp1, Fp2                  |
| S14     | 29,96                 | 1 981           | 396            | Fp1, Fp2, F7, FT9, FT10   |
| S15     | 44,96                 | 1 906           | 381            | Fp1, Fp2, F7              |

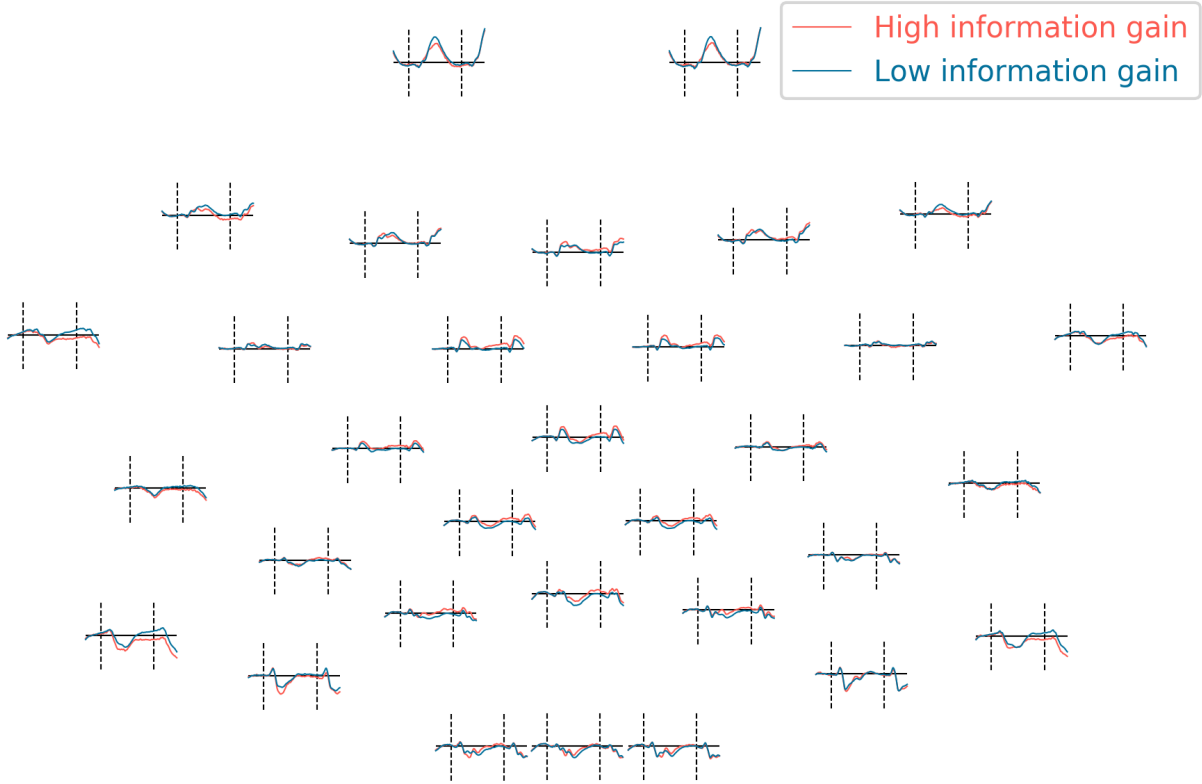

**Fig. S2.** ERPs for high and low information gain words for all channels. Dashed lines mark stimuli onsets. The averages for channels Fp1 and Fp2 are dominated by the measurements of only a few participants, as the said channels were interpolated on most of the participants.



**Table S3. Top 5 words per topic sorted by classifier confidence (predicted) for class membership (high/low information gain) and by true class membership (high/low information gain). All words are converted to lower case.**

| Document topic | Top/bottom 5 words in information gain class:                  |                                                                 |                                        |                               |
|----------------|----------------------------------------------------------------|-----------------------------------------------------------------|----------------------------------------|-------------------------------|
|                | High IG Predicted                                              | High IG True                                                    | Low IG Predicted                       | Low IG True                   |
| atom           | quantum<br>successfully<br>microscope<br>positively<br>only    | neutrons<br>isotope<br>protons<br>radioactive<br>nucleus        | or<br>have<br>such<br>one<br>that      | the<br>and<br>a<br>of<br>is   |
| automobile     | regarded<br>affordable<br>million<br>automobile<br>billion     | motorcar<br>benz<br>baggage<br>electrified<br>risen             | one<br>many<br>after<br>soon<br>or     | the<br>and<br>in<br>a<br>of   |
| bank           | deficits<br>surpluses<br>regulated<br>liabilities<br>highly    | berenberg<br>paschi<br>institutionalised<br>surpluses<br>siena  | either<br>is<br>on<br>are<br>existing  | the<br>and<br>in<br>a<br>of   |
| bicycle        | automobiles<br>bicycles<br>worldwide<br>played<br>changed      | sprockets<br>bicyclist<br>pneumatic<br>cyclist<br>upright       | around<br>century<br>to<br>an<br>first | the<br>and<br>in<br>a<br>of   |
| bill clinton   | arkansas<br>democrat<br>born<br>described<br>agreement         | boomer<br>42nd<br>peacetime<br>arkansas<br>jefferson            | who<br>an<br>over<br>to<br>in          | the<br>and<br>in<br>a<br>of   |
| brain          | generating<br>invertebrate<br>special<br>hormones<br>control   | synapses<br>cortex<br>sensory<br>cerebral<br>hormones           | as<br>typical<br>center<br>a<br>with   | the<br>and<br>in<br>a<br>of   |
| cat            | killing<br>housecat<br>mammal<br>indoor<br>despite             | housecat<br>felids<br>purring<br>mewing<br>felines              | with<br>for<br>as<br>such<br>being     | the<br>and<br>in<br>a<br>of   |
| communism      | marxism<br>maximized<br>distinction<br>socialized<br>marx      | marxism<br>socioeconomic<br>marx<br>dictatorship<br>recycling   | has<br>in<br>and<br>absence<br>is      | the<br>and<br>in<br>a<br>of   |
| euro           | dollar<br>eurozone<br>december<br>following<br>european        | eurozone<br>banknotes<br>currency<br>euro<br>coins              | has<br>into<br>as<br>july<br>2002      | the<br>and<br>in<br>of<br>was |
| football       | opposing<br>penalty<br>rectangular<br>eleven<br>touch          | torso<br>spherical<br>codified<br>outfield<br>goalkeepers       | as<br>are<br>into<br>were<br>to        | the<br>and<br>in<br>a<br>of   |
| india          | independence<br>asia<br>independent<br>civilisation<br>mahatma | pluralistic<br>indus<br>multilingual<br>mahatma<br>civilisation | to<br>nation<br>in<br>vast<br>of       | the<br>and<br>in<br>a<br>of   |

|                  |                                                                      |                                                                        |                                          |                             |
|------------------|----------------------------------------------------------------------|------------------------------------------------------------------------|------------------------------------------|-----------------------------|
| learning         | machines<br>consciously<br>reinforcing<br>habituation<br>intelligent | habituation<br>factual<br>conscious<br>synthesizing<br>consciously     | human<br>to<br>activities<br>of<br>and   | the<br>and<br>in<br>a<br>of |
| machine learning | filtering<br>algorithm<br>unsupervised<br>outputs<br>deals           | subfield<br>unsupervised<br>spam<br>conflated<br>filtering             | by<br>with<br>include<br>search<br>that  | the<br>and<br>in<br>a<br>of |
| michael jackson  | professional<br>philanthropist<br>publicized<br>1982<br>brothers     | moonwalk<br>philanthropist<br>robot<br>thriller<br>dancer              | an<br>to<br>such<br>as<br>with           | the<br>and<br>in<br>a<br>of |
| money            | medium<br>repayment<br>banknotes<br>intrinsic<br>market              | banknotes<br>fiat<br>intrinsic<br>deferred<br>repayment                | to<br>and<br>its<br>accepted<br>of       | the<br>and<br>in<br>a<br>of |
| ocean            | hydrosphere<br>impetus<br>emergence<br>divisions<br>contains         | hadean<br>hydrosphere<br>oceanographers<br>saline<br>impetus           | in<br>and<br>on<br>which<br>an           | the<br>and<br>in<br>a<br>of |
| painting         | spiritual<br>craftsmen<br>surface<br>brush<br>outside                | airbrushes<br>sponges<br>knives<br>craftsmen<br>pigment                | to<br>act<br>or<br>be<br>such            | the<br>and<br>in<br>a<br>of |
| plato            | philosophical<br>aristotle<br>academy<br>athens<br>higher            | socrates<br>socratic<br>plato<br>platonism<br>aristotle                | is<br>been<br>in<br>perspective<br>have  | the<br>and<br>in<br>a<br>of |
| politics         | practice<br>employed<br>international<br>influencing<br>institutions | adversaries<br>sovereign<br>discourse<br>civic<br>warfare              | in<br>or<br>which<br>wide<br>among       | the<br>and<br>in<br>a<br>of |
| rome             | michelangelo<br>bramante<br>province<br>baroque<br>architecture      | bramante<br>bernini<br>sistine<br>tiber<br>michelangelo                | to<br>chapel<br>for<br>in<br>was         | the<br>and<br>in<br>a<br>of |
| savanna          | unbroken<br>hemisphere<br>grassland<br>majority<br>seasonal          | unbroken<br>herbaceous<br>savannas<br>savanna<br>savannah              | also<br>of<br>and<br>common<br>by        | the<br>and<br>in<br>a<br>of |
| schizophrenia    | syndromes<br>characterized<br>schizophrenia<br>unclear<br>important  | contributory<br>antipsychotic<br>dopamine<br>auditory<br>schizophrenia | a<br>have<br>often<br>number<br>receptor | the<br>and<br>a<br>of<br>is |
| school           | teenagers<br>homeschooling<br>building<br>an<br>dedicated            | homeschooling<br>compulsory<br>vocational<br>seminary<br>teenagers     | a<br>but<br>have<br>the<br>who           | the<br>and<br>in<br>a<br>of |

|           |                                                                          |                                                                  |                                      |                             |
|-----------|--------------------------------------------------------------------------|------------------------------------------------------------------|--------------------------------------|-----------------------------|
| society   | institutions<br>ant<br>insofar<br>otherwise<br>societies                 | criminology<br>subculture<br>interpersonal<br>insofar<br>ant     | on<br>used<br>and<br>by<br>that      | the<br>and<br>in<br>a<br>of |
| star      | gaseous<br>primarily<br>gravity<br>plasma<br>source                      | asterisms<br>luminous<br>nebula<br>helium<br>gaseous             | to<br>collapse<br>a<br>the<br>space  | the<br>and<br>a<br>of<br>is |
| telephone | transmissions<br>telecommunications<br>landline<br>microphone<br>numeric | earphone<br>keypad<br>landline<br>microphone<br>cellular         | on<br>two<br>by<br>such<br>first     | the<br>and<br>in<br>a<br>of |
| time      | astronomy<br>occupied<br>debate<br>quantities<br>durations               | technologists<br>judgement<br>temporal<br>astronomy<br>sensation | from<br>in<br>component<br>was<br>as | the<br>and<br>in<br>a<br>of |
| volcano   | eruption<br>temperature<br>tectonic<br>surface<br>atmosphere             | troposphere<br>droplets<br>magma<br>plumes<br>crust              | to<br>can<br>is<br>lower<br>on       | the<br>and<br>in<br>a<br>of |
| wife      | varies<br>cultures<br>heterosexual<br>separated<br>widow                 | heterosexual<br>marital<br>spouse<br>obligations<br>widow        | from<br>of<br>also<br>may<br>in      | the<br>and<br>in<br>a<br>of |
| wine      | chemical<br>thousands<br>egyptians<br>appearance<br>nutrients            | 6000bc<br>yeasts<br>ferment<br>fermented<br>beverage             | so<br>lets<br>is<br>has<br>and       | the<br>and<br>in<br>a<br>of |

120 **Movie S1. Animation of differential scalp topographies for low/high information gain words for the time**  
121 **interval 0 - 1000 ms post-stimuli. The topographies advance in steps of 5 ms.**

## 122 **References**

- 123 1. Manning CD, Raghavan P, Schütze H (2008) Language models for information retrieval in *Introduction to information*  
124 *retrieval*. (Cambridge University Press, New York). OCLC: ocn190786122.
- 125 2. Porter M (1980) An algorithm for suffix stripping. *Program* 14(3):130–137.
- 126 3. Barr DJ, Levy R, Scheepers C, Tily HJ (2013) Random effects structure for confirmatory hypothesis testing: Keep it  
127 maximal. *Journal of Memory and Language* 68(3):255–278.
- 128 4. Matuschek H, Kliegl R, Vasishth S, Baayen H, Bates D (2017) Balancing type i error and power in linear mixed models.  
129 *Journal of Memory and Language* 94:305 – 315.
- 130 5. Akaike H (1998) Information theory and an extension of the maximum likelihood principle in *Selected papers of hirotugu*  
131 *akaike*. (Springer), pp. 199–213.
- 132 6. Blankertz B, Lemm S, Treder M, Haufe S, Müller KR (2011) Single-trial analysis and classification of ERP components —  
133 A tutorial. *NeuroImage* 56(2):814–825.
- 134 7. Ledoit O, Wolf M (2004) A well-conditioned estimator for large-dimensional covariance matrices. *Journal of Multivariate*  
135 *Analysis* 88(2):365–411.
- 136 8. Xue JH, Titterington DM (2008) Do unbalanced data have a negative effect on LDA? *Pattern Recognition* 41(5):1558–1571.
- 137 9. Xue J, Hall P (2015) Why Does Rebalancing Class-Unbalanced Data Improve AUC for Linear Discriminant Analysis?  
138 *IEEE Transactions on Pattern Analysis and Machine Intelligence* 37(5):1109–1112.
- 139 10. Ojala M, Garriga GC (2009) Permutation Tests for Studying Classifier Performance in *2009 Ninth IEEE International*  
140 *Conference on Data Mining*. (IEEE, Miami Beach, FL, USA), pp. 908–913.
